# Supplementary material for: Cryoconite: an efficient accumulator of radioactive fallout in glacial environments
Source: Copernicus journal article supplement (doi:10.5194/tc-14-657-2020), 2020-02-14
Supplement: Supplementary file 1 [file S1_DataFile.xlsx]

## Sheet: Data
Sample	Glacier	Sampling Date	137Cs (Bq Kg-1)		241Am (Bq Kg-1)		207Bi (Bq Kg-1)		239+240Pu (Bq Kg-1)		238Pu (Bq Kg-1)		40K (Bq Kg-1)		238U (Bq Kg-1)		234Th (Bq Kg-1)		214Pb (Bq Kg-1)		214Bi (Bq Kg-1)		Supp. 210Pb (Bq Kg-1)		Unsupp. 210Pb (Bq Kg-1)		232Th (Bq Kg-1)		228Ac (Bq Kg-1)		224Ra (Bq Kg-1)		212Pb (Bq Kg-1)		212Bi (Bq Kg-1)		208Tl (Bq Kg-1)		Organic Carbon		Elemental Carbon
			Activity	Error	Activity	Error	Activity	Error	Activity	Error	Activity	Error	Activity	Error	Activity	Error	Activity	Error	Activity	Error	Activity	Error	Activity	Error	Activity	Error	Activity	Error	Activity	Error	Activity	Error	Activity	Error	Activity	Error	Activity	Error	%	err.	%	err.
CR3	Morteratsch	July 2015	13557.9	697.294	120.359	8.68768	25.2024	4.78608	215.443	14.4353	6.43941	0.658082	720.576	56.7938	59.5221	5.30291	55.9297	18.975	42.8011	4.40418	42.2584	5.24537	57.4226	20.122	2343.38	172.462	74.3641	7.23403	55.5892	5.98263	49.9893	25.7653	52.6472	4.8306	63.0312	17.87	42.8997	6.34115	4.7	0.3	0.4101	0.06
CR4	Morteratsch	September 2015	479.605	27.7757	5.68177	0.967284	9.15148	3.94385					768.344	59.4727	61.0671	5.30524	110.875	12.6775	56.9972	4.55692	56.72	6.48263	71.4148	26.3816	3312.39	225.197	59.1832	4.48733	41.1521	5.53873	37.0934	15.3476	47.6545	3.85739	43.8937	15.1924	55.08	8.43903	5.7	0.3	0.3089	0.05
CR5	Morteratsch	September 2015	482.964	27.8775	2.86559	0.634524	2.63333	-					754.224	58.1745	52.5079	4.71577	95.4486	11.4449	54.5062	4.54568	57.6161	6.44177	65.0197	20.3945	3546.84	231.091	46.2196	3.56634	44.6619	5.82435	36.4937	15.3567	49.3514	3.92928	41.1523	13.1526	43.792	7.20862	5.2	0.3	0.3952	0.06
CR6	Morteratsch	September 2015	509.291	29.166	5.40084	0.946107	10.6945	5.37389					752.921	57.5097	58.856	5.1242	100.863	11.686	59.7063	4.82785	58.6312	6.45469	69.5142	20.9046	3383.3	221.716	50.1734	3.86306	41.7494	5.52114	26.0472	14.8429	50.7659	3.989	52.6221	15.3134	53.343	7.84913	5.4	0.3	0.3355	0.05
CR10	Morteratsch	July 2016	3487.17	181.595	43.6662	3.29964	13.6106	2.76286	84.9917	5.49618	3.16386	0.254664	846.559	58.1226	83.5338	7.44231	99.9475	14.2089	62.3445	4.68978	60.4647	5.37308	74.8784	18.2285	2043.33	142.766	66.623	4.35614	47.0263	4.92472	35.4758	12.7249	49.293	3.61062	50.8713	10.8249	50.6844	5.21471	3.5	0.2	0.854421	0.04
CR11	Morteratsch	July 2016	5290.11	276.828	65.2463	5.06627	16.4067	3.89297	137.662	9.21365	5.21167	0.518663	785.809	60.3111	91.0719	10.4856	85.3739	13.0075	53.3283	4.7787	52.4985	5.89173	80.2613	32.6771	2300.63	179.737	66.3048	5.05476	41.4002	4.99702	21	-	44.5133	3.91098	42.5511	12.1323	46.5985	6.41087	3.60487	0.2	0.995583	0.08
CR12	Morteratsch	July 2016	324.536	18.7061	5.14573	0.677346	3	-					872.092	60.5154	49.0849	4.08634	77.3347	10.5826	67.6194	4.6584	68.1485	5.77757	65.4632	11.7361	1581.46	110.684	69.4947	2.94451	43.9881	3.98511	20.6448	10.5026	50.2362	3.54917	55.1531	11.8817	45.0051	4.62943	4.84732	0.3	0.21723	0.07
CR13	Morteratsch	July 2016	387.667	22.4444	3.06129	0.727057	7.54348	2.74288	2.39185	0.2027	0.0496717	0.0128124	903.4	64.8662			85.5755	13.8673	65.2286	4.74155	67.3407	6.10353	72.5231	10.8568	2027.48	136.929			51.089	4.70233	27.9203	12.3752	54.652	3.98962	48.8873	12.571	52.4196	5.5082
CR14	Morteratsch	July 2016	2046.04	107.274	26.9114	2.07742	7.8104	2.22967	26.8313	1.89111	0.858153	0.124755	793.819	53.4175	57.0906	4.24324	92.2813	9.67414	59.7439	4.16472	58.552	5.26992	66.9169	16.9444	2846.98	180.924	65.8369	2.44353	47.4746	4.12538	32.2509	10.7243	52.1839	3.59429	51.0119	10.1183	49.0417	5.73258	4.03994	0.2	0.490594	0.07
CR15	Morteratsch	July 2016	3403.44	180.152	58.8131	4.65821	9.34339	3.14452	67.335	4.50937	2.07351	0.229241	870.569	66.1435	81.0214	7.92928	75.8669	13.0181	52.7557	4.98459	57.1186	6.89058	61.9137	12.2791	2156.15	151.243	75.2349	4.41119	49.8693	6.37235	58.3328	21.7946	50.2821	4.40031	51.2261	14.6938	52.6793	8.44857
CR16	Morteratsch	July 2016	1006.34	55.0174	14.4885	1.49696	5.5491	1.72876	10.9985	0.754122	0.278115	0.0401819	804.922	58.6437	78.3707	5.98623	82.0677	13.6486	50.9041	3.98183	45.1131	5.10654	66.6544	21.8101	2711.88	184.36	65.2893	2.53368	44.0271	4.45088	21	-	46.641	3.54965	59.2808	12.8518	43.6821	6.25607	5.64571	0.3	0.535724	0.07
CR17	Morteratsch	July 2016	684.573	37.8907	10.0604	1.21337	3	-					817.251	58.408	77.3048	6.03202	99.5953	13.3994	61.6782	4.52348	62.8835	5.73855	75.2166	17.3724	4142.82	254.614	70.788	2.7023	50.9323	4.78537	41.5134	13.3194	54.897	3.97418	63.4628	13.8451	54.673	5.79843	4.7196	0.3	0.316262	0.06
F2	Forni	July 2016	1013.69	56.4418	5.21283	1.02926	7.07598	2.58832	4.44857	0.347655	0.227763	0.0389123	854.714	65.2394	60.8559	3.66713	49.6096	17.1143	44.8131	3.58516	47.4592	4.97401	71.0745	43.2146	7225.68	452.797	78.85	9.6503	50.7914	5.81219	57.2222	10.9398	59.0708	4.62259	69.1958	18.0273	54.3074	7.47159	3.41742	0.237014	0.284785	0.159847
F3	Forni	July 2016	965.9	54.0093	3.38999	0.743032	6.77366	2.33852					769.282	61.1908	67.7415	4.3791	85.5016	11.2984	45.7467	3.48356	43.4041	5.26517	60.5984	19.8948	7465.8	441.691	75.338	10.579	48.5179	4.75131	37.4957	9.87758	55.6272	4.434	60.0571	16.8816	52.9695	8.56772	3.10236	0.263322	0.154361	0.039347
F6	Forni	July 2016	477.226	27.9517	1.86141	0.536779	3	-	6.01883	0.438583	0.28319	0.0421888	282.583	27.6521	44.5411	3.58228	18	-	16.3693	1.78138	16.0821	2.933	16.9837	1.32078	2046.17	129.701	60.9266	10.3549	22.6827	3.46901	15.5889	6.04736	21.7236	2.15131	21.0648	8.7859	20.5758	4.19686	3.24279	0.226995	0.250416	0.0306264
F7	Forni	July 2016	9802.48	494.953	6.31149	1.03022	7.53212	3.18444					758.376	56.9737	57.4906	4.70896	89.0277	10.921	42.2835	3.08506	47.7163	5.03121	59.1295	20.9017	8031.75	464.967	72.4629	2.81944	55.2817	4.76581	38.5681	8.99814	55.5333	4.20994	52.4748	14.3042	52.5934	8.3423
F8	Forni	July 2016	802.458	51.1973	3.3254	1.55934	9.90705	4.45817	4.06042	0.280698	0.161725	0.0223789	747.41	81.9053	66.357	3.94105	62.0497	15.0287	50.2043	5.92425	45.329	8.84588	48.6671	2.89385	6525.26	423.685	74.6944	9.62836	65.2498	9.31023	52.9881	21.07	55.7997	6.44139	81.2551	39.6935	46.5346	15.735	4.39106	0.368715	0.270307	0.172029
F9	Forni	July 2016	1307.37	72.0728	7.20619	1.31207	5.92915	2.734					789.833	63.1511	62.3164	3.64246	86.0679	12.0994	47.9673	3.71832	54.7964	6.20776	62.787	16.5901	7036.45	416.522	73.4489	10.2175	54.0872	5.24015	23.1759	10.0012	57.9443	4.68067	59.2695	18.4251	57.6008	9.14314	4.02722	0.353118	0.468814	0.028068
F10	Forni	July 2016	1244.84	69.4687	3.83809	0.869968	2.57874	2.70768	5.22794	0.390913	0.245155	0.0380306	791.329	64.373	62.9885	3.53931	49.716	11.7678	45.9792	3.90523	41.0729	4.97393	45.5894	4.33469	7013.35	407.406	68.3456	10.0919	52.9124	6.52436	21	-	52.4896	4.45466	55.4785	17.274	56.6903	7.86871	3.17991	0.167892	0.177389	0.042119
F13	Forni	July 2016	1295.61	71.0637	5.47757	1.00856	5.27204	3.25109	6.11047	0.451484	0.359697	0.0541676	764.527	59.8648	64.6642	3.37486	49.9893	11.6365	46.824	3.635	47.6388	4.96148	61.6187	24.9229	6860.53	412.791	65.5862	10.1017	60.0677	6.26562	21	-	56.812	4.40511	59.9709	18.0214	49.2019	6.59349	3.74908	0.356163	0.123539	0.0562362
F15	Forni	July 2016	1295.05	73.8557	3.08517	1.06053	3	-	4.59384	0.358306	0.158902	0.031674	877.783	75.8765	69.7472	4.58278	49.5883	10.6551	49.0764	4.64607	48.2328	6.1117	47.2565	2.4581	4496.19	280.382	79.4872	11.1608	56.4855	7.50816	62.158	15.458	55.6756	5.12291	67.9378	22.8258	50.8753	8.41119	4.0548	0.615054	0.0538503	0.125289
F20	Forni	July 2016	603.215	35.1936	4.19822	1.15237	6.16773	2.92967	3.76529	0.294197	0.120227	0.0236282	1092.49	82.8396	75.8332	2.99424	67.8491	14.1231	56.1153	4.11712	61.4771	6.79881	78.2051	33.724	4631.64	310.039	72.7188	8.63757	66.1017	5.93107	52.0497	12.0098	67.3481	5.31445	68.3455	19.6974	69.4956	10.9936	3.5694	0.386832	0.110868	0.0703331
artificial nuclides
40K
238U decay chain
232Th decay chain
carbonaceous content
x	measured activity
x	minimum detectable activity
	N.A.
