# Supplementary material for: Cryoconite: an efficient accumulator of radioactive fallout in glacial environments
Source: Copernicus journal article supplement (doi:10.5194/tc-14-657-2020), 2020-02-14
Supplement: Supplementary file 2 [file tc-14-657-2020-supplement.zip]

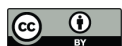

## *Supplement of*

# **Cryoconite: an efficient accumulator of radioactive fallout in glacial environments**

**Giovanni Baccolo et al.**

*Correspondence to:* Giovanni Baccolo ([giovanni.baccolo@unimib.it](mailto:giovanni.baccolo@unimib.it))

- [tc-14-657-2020-supplement-title-page.pdf](#)
- Supplementary
  - [S1\\_DataFile.xlsx](#)
  - [Supplementary material Cryosphere\\_Revised.pdf](#)

The copyright of individual parts of the supplement might differ from the CC BY 4.0 License.
